# Supplementary material for: Preparation of Sn-doped CuAlS2 films with an intermediate band and wide-spectrum solar response
Source: Royal Society of Chemistry journal article supplement (doi:10.1039/c6ra00946h), 2016-01-01
Supplement: c6ra00946h1.pdf [file c6ra00946h1.pdf]

## Electronic Supplementary Information (ESI) for

### Preparation of Sn-doped CuAlS<sub>2</sub> films with an intermediate band and wide-spectrum solar response

Chenguang Guo,<sup>a</sup> Chongyin Yang,<sup>a</sup> Yian Xie,<sup>a</sup> Ping Chen,<sup>a</sup> Mingsheng Qin,<sup>a</sup> Rongtie Huang,<sup>c</sup>

Fuqiang Huang\*<sup>ab</sup>

a. CAS Key Laboratory of Materials for Energy Conversion, Shanghai Institute of Ceramics, Chinese Academy of Sciences, Shanghai 200050, P. R. China;

b. State Key Laboratory of Rare Earth Materials Chemistry and Applications, College of Chemistry and Molecular Engineering, Peking University, Beijing 100871, China;

c. Department of Physics, Shanghai University, Shanghai 200444, P. R. China.

**Corresponding author:** [huangfq@mail.sic.ac.cn](mailto:huangfq@mail.sic.ac.cn)

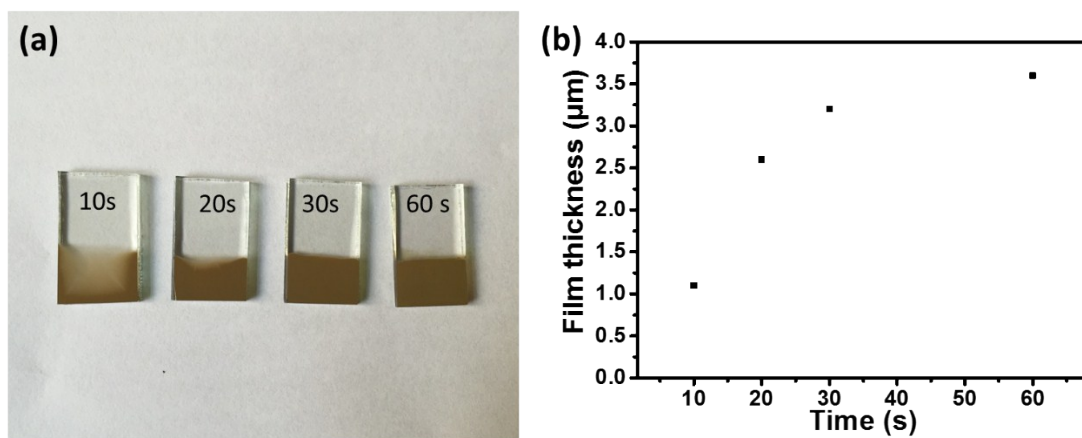

Figure S1. (a) Sn-doped CuAlS<sub>2</sub> films with different EPD time; (b) The influence of EPD time on the film thickness

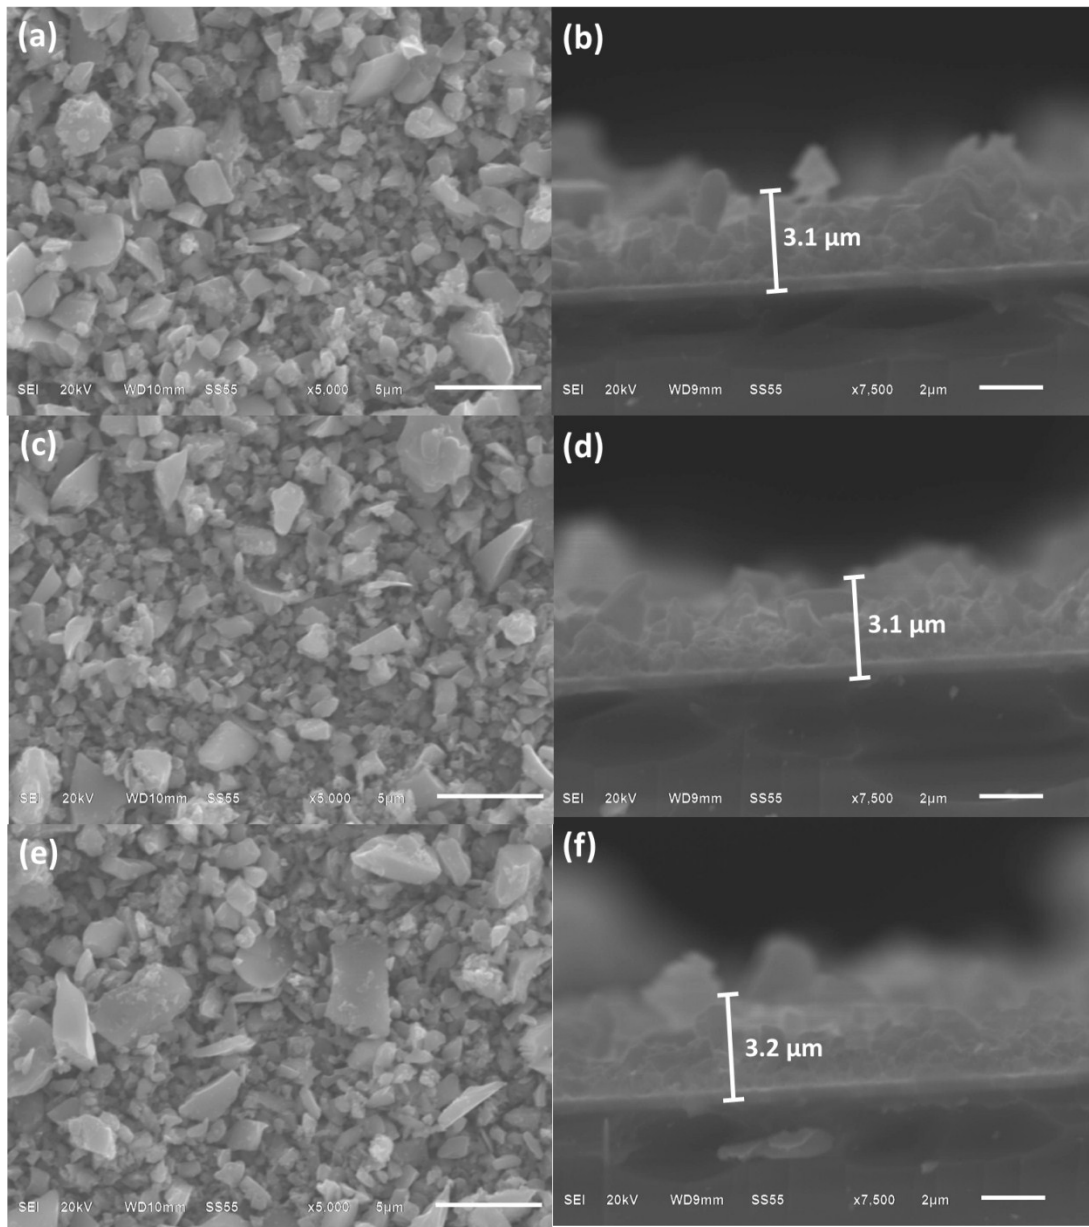

**Figure S2.** (a) Top view SEM image of CuAlS<sub>2</sub> film; (b) Side view SEM image of CuAlS<sub>2</sub> film; (c) Top view SEM image of CuAl<sub>0.98</sub>Sn<sub>0.02</sub>S<sub>2</sub> film; (d) Side view SEM image of CuAl<sub>0.98</sub>Sn<sub>0.02</sub>S<sub>2</sub> film; (e) Top view SEM image of CuAl<sub>0.96</sub>Sn<sub>0.04</sub>S<sub>2</sub> film; (f) Side view SEM image of CuAl<sub>0.96</sub>Sn<sub>0.04</sub>S<sub>2</sub> film.

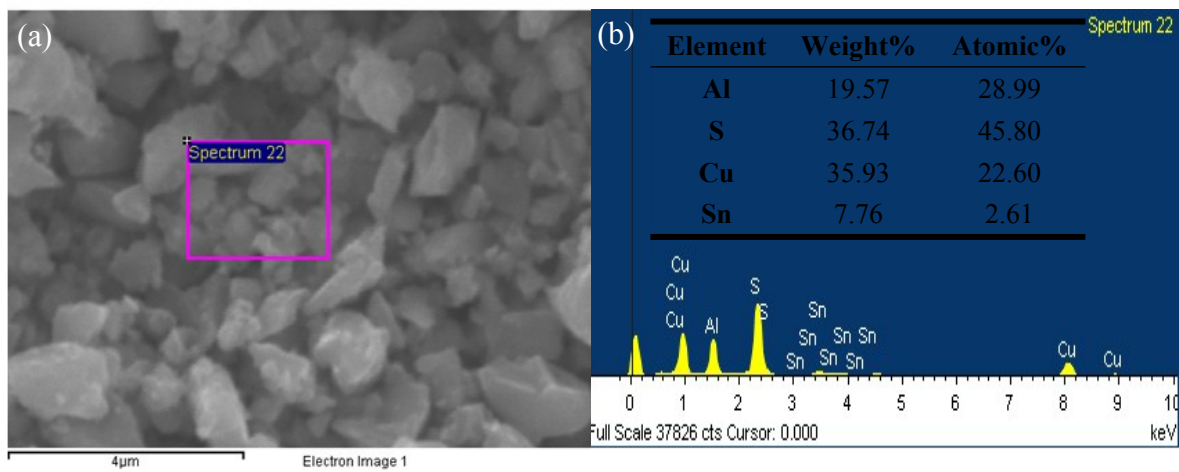

**Figure S3.** EDS spectrum and element analysis result of  $\text{CuAl}_{0.96}\text{Sn}_{0.04}\text{S}_2$  films.
